# Supplementary material
Source: publisher site journal article supplement (https://www.dovepress.com/article/441628)
Supplement: Supplementary file 1 [file get_supplementary_file.php]

**The Supplementary Information**


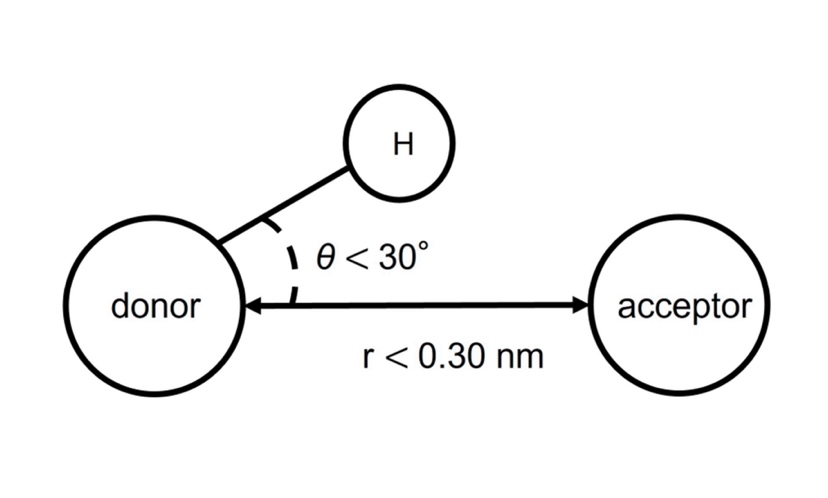


**Supplementary Figure 1.** Conditions for Calculating Hydrogen Bonding

**
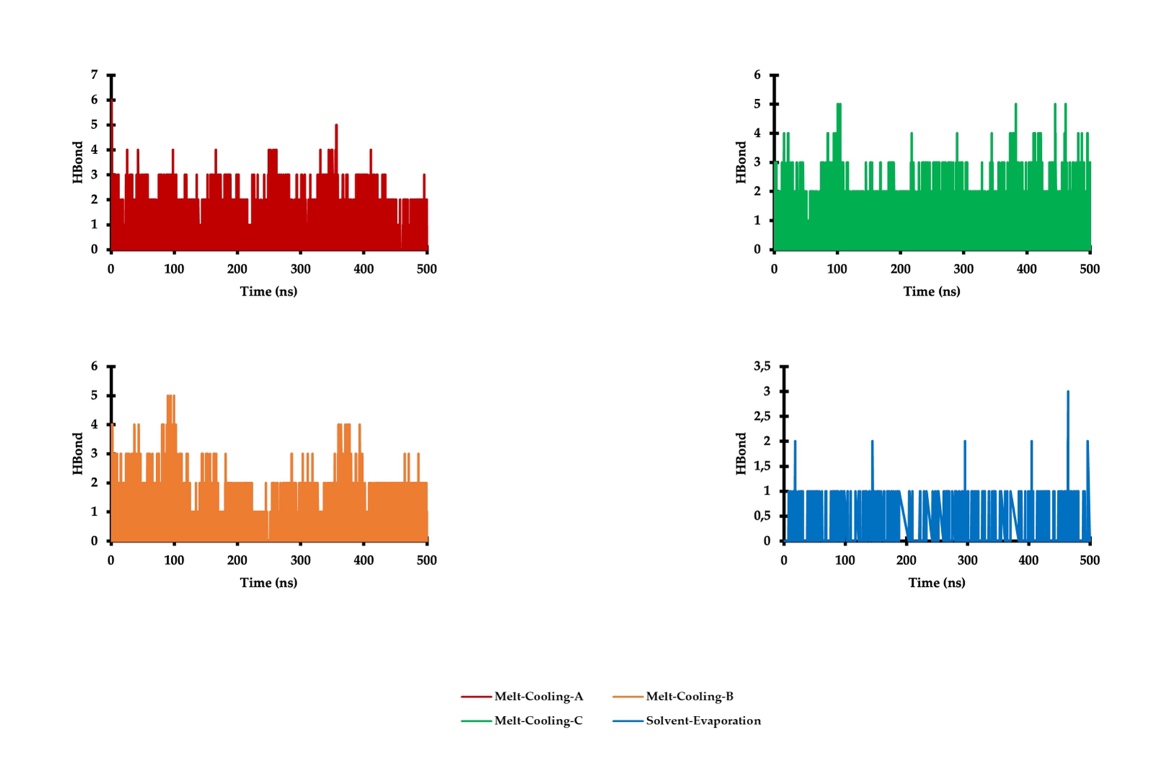
**

**Supplementary Figure 2.** Comparison of the Hydrogen Bond (H-bond) Graphs of the Complex System During Molecular Dynamics Simulations

**Supplementary Table 1.** The Molecular Docking Interaction between Ritonavir and Polymers

| No | Polymer | Binding Energy (kcal/mol) | Hydrogen bond distance (Å) |
| --- | --- | --- | --- |
| 1 | *Hypromellose* (HPMC) | -5.28 | 2.03 |
| 2 | *Hypromellose phthalate* (HPMCP) | -2.75 | 2.16 |
| 3 | *Hypromellose acetate succinate* (HPMCAS) | -2.25 -5.11 | 2.20 2.02 |
| 4 | *Polyvinylpyrrolidone* (PVP) | -4.16 | 2.03 |
| 5 | *Polyvinyl acetate* (PVA) | -5.84 | 1.99 |
| 6 | *Co-povidone* (PVPVA) | -3.28 | 2.00 |
| 7 | Eudragit | -5.06 | 2.07 |
| 8 | *Polyvinyl acetate phthalate* (PVAP) | -0.38 -4.78 | 2.00 2.14 |
| 9 | Methyl cellulose | -5.91 -3.53 | 1.99 1.99 |
| 10 | Ethyl cellulose | -3.05 | 2.16 |
| 11 | Natrium alginate | -5.59 -2.30 | 2.05 2.17 |
| 12 | Carbomer | -2.55 | 2.09 |
| 13 | PEG | -6.61 | 1.93 |
| 14 | Chitosan | -2.55 -3.28 -4.14 -0.60 | 2.20 1.86 2.07 2.17 |
| 15 | *Water soluble chitin* | -6.06 | 1.99 |
| 16 | Soluplus | -5.44 | 2.06 |
| 17 | *Locust bean gum* | -5.21 | 2.10 |
| 18 | *Cellulose acetate phthalate* (CAP) | -4.64 | 2.13 |
| 19 | Poloxamer 188 | -5.64 -5.58 | 2.10  1.98 |
| 20 | *D-ɑ-tocopheryl polyethylene glycol succinate* (TPGS) | -3.36 | 2.11 |
| 21 | 5-*carboxypentyl hydroxypropyl cellulose* (5-CHC) | -2.06 -7.84 | 2.13 1.78 |

**Supplementary Table 2.** Interaction Dynamics of the RTV and PLX During Molecular Dynamics Simulations

| **Melt-Cooling-A** | **Interaction** | **Category** | **Distance** |
| --- | --- | --- | --- |
| 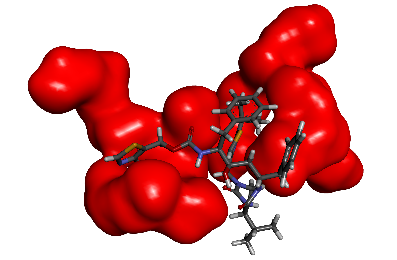  0 ns  Temperature: 0oC  Hydrogen Bond: 7 interactions  Poloxamer: 4 molecules | RIT - POL9:O3  RIT - POL9:O3  POL15:H29 - RIT  POL23:H29 - RIT1:O6  RIT - POL23:O2  RIT - POL24:O3  POL23:H22 - RIT | Hydrogen Bond  Hydrogen Bond  Hydrogen Bond  Hydrogen Bond  Hydrogen Bond  Hydrogen Bond  Hydrogen Bond | 2.05 Å  3.02 Å  2.04 Å  1.89 Å  2.61 Å  2.89 Å  2.40 Å |
| 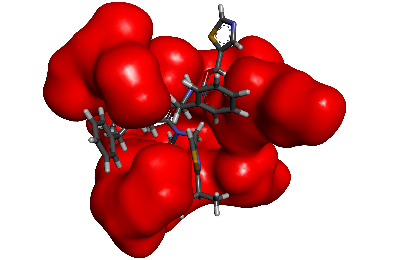  250 ns  Temperature: 140oC  Hydrogen Bond: 15 interactions  Poloxamer: 7 molecules | RIT - POL9:O3  RIT - POL3:O3  POL3:H29 - RIT  POL13:H29 - RIT  POL20:H29 - RIT  RIT - POL20:O3  RIT - POL15:O3  RIT - POL11:O1  RIT - POL3:O2  POL11:H13 - RIT  POL11:H22 - RIT  POL13:H15 - RIT  POL18:H27 - RIT  POL18:H28 - RIT  POL20:H23 - RIT | Hydrogen Bond  Hydrogen Bond  Hydrogen Bond  Hydrogen Bond  Hydrogen Bond  Hydrogen Bond  Hydrogen Bond  Hydrogen Bond  Hydrogen Bond  Hydrogen Bond  Hydrogen Bond  Hydrogen Bond  Hydrogen Bond  Hydrogen Bond  Hydrogen Bond | 2.15 Å  2.13 Å  1.72 Å  2.27 Å  1.86 Å  2.27 Å  2.76 Å  2.98 Å  2.44 Å  2.59 Å  2.75 Å  2.64 Å  3.03 Å  2.97 Å  2.90 Å |
| 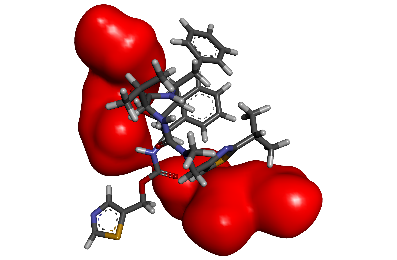  500 ns  Temperature: 0oC  Hydrogen Bond: 2 interactions  Poloxamer: 2 molecules | POL11:H29 - RIT  POL26:H29 - RIT | Hydrogen Bond  Hydrogen Bond | 2.12 Å  2.34 Å |

**Supplementary Table 2.** Interaction Dynamics of the RTV and PLX During Molecular Dynamics Simulations (Cont.)

| **Melt-Cooling-A** | **Interaction** | **Category** | **Distance** |
| --- | --- | --- | --- |
| 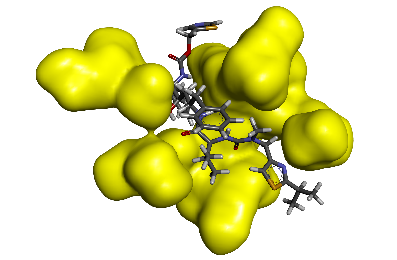  0 ns  Temperature: 0oC  Hydrogen Bond: 11 interactions  Poloxamer: 7 molecules | RIT - POL26:O3  POL20:H29 - RIT  POL24:H29 - RIT  RIT - POL24:O3  RIT - POL14:O2  RIT - POL4:O3  POL14:H12 - RIT  POL20:H23 - RIT  POL22:H22 - RIT  POL25:H22 - RIT  POL26:H14 - RIT | Hydrogen Bond  Hydrogen Bond  Hydrogen Bond  Hydrogen Bond  Hydrogen Bond  Hydrogen Bond  Hydrogen Bond  Hydrogen Bond  Hydrogen Bond  Hydrogen Bond  Hydrogen Bond | 2.16 Å  2.04 Å  2.07 Å  2.55 Å  2.85 Å  2.74 Å  2.63 Å  2.56 Å  2.64 Å  2.79 Å  2.64 Å |
| 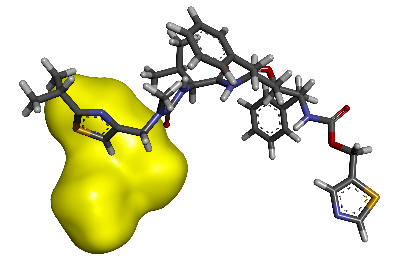  250 ns  Temperature: 140oC  Hydrogen Bond: 1 interaction  Poloxamer: 1 molecule | POL8:H13 - RIT | Hydrogen Bond | 2.67 Å |
| 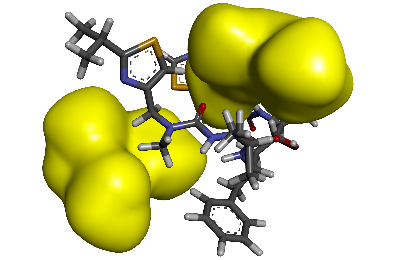  500 ns  Temperature: 0oC  Hydrogen Bond: 7 interactions  Poloxamer: 2 molecules | RIT - POL4:O3  POL4:H29 - RIT  RIT - POL18:O1  RIT - POL18:O3  POL4:H14 - RIT  POL4:H27 - RIT  POL4:H28 - RIT | Hydrogen Bond  Hydrogen Bond  Hydrogen Bond  Hydrogen Bond  Hydrogen Bond  Hydrogen Bond  Hydrogen Bond | 1.99 Å  2.01 Å  2.52 Å  2.75 Å  2.45 Å  2.91 Å  2.99 Å |

**Supplementary Table 2.** Interaction Dynamics of the RTV and PLX During Molecular Dynamics Simulations (Cont.)

| **Melt-Cooling-A** | **Interaction** | **Category** | **Distance** |
| --- | --- | --- | --- |
| 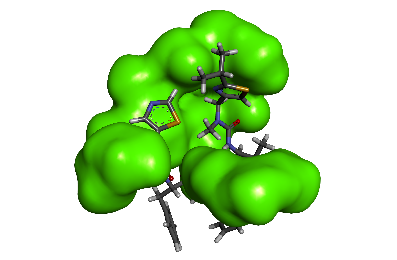  0 ns  Temperature: 0oC  Hydrogen Bond: 13 interactions  Poloxamer: 6 molecules | RIT - POL20:O3  RIT - POL10:O2  RIT - POL3:O3  POL2:H29 - RIT  POL10:H29 - RIT  POL19:H29 - RIT  RIT - POL10:O2  RIT - POL3:O3  RIT - POL9:O1  RIT - POL2:O3  POL3:H28 - RIT  POL19:H28 - RIT  POL20:H23 - RIT | Hydrogen Bond  Hydrogen Bond  Hydrogen Bond  Hydrogen Bond  Hydrogen Bond  Hydrogen Bond  Hydrogen Bond  Hydrogen Bond  Hydrogen Bond  Hydrogen Bond  Hydrogen Bond  Hydrogen Bond  Hydrogen Bond | 1.89 Å  1.97 Å  2.11 Å  2.68 Å  1.98 Å  1.75 Å  2.58 Å  2.60 Å  2.49 Å  2.57 Å  2.49 Å  2.80 Å  2.33 Å |
| 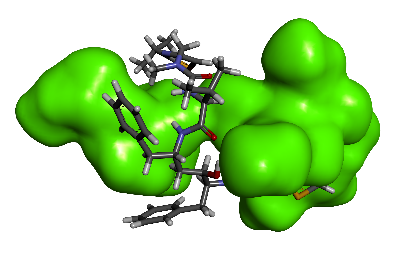  250 ns  Temperature: 140oC  Hydrogen Bond: 7 interactions  Poloxamer: 5 molecules | RIT - POL7:O3  POL17:H29 - RIT  RIT - POL20:O2  X: POL17:H16 - RIT  X: POL17:H28 - RIT  X: POL21:H22 - RIT  X: POL18:H29 - RIT | Hydrogen Bond  Hydrogen Bond  Hydrogen Bond  Hydrogen Bond  Hydrogen Bond  Hydrogen Bond  Hydrogen Bond | 2.37 Å  1.84 Å  2.40 Å  2.98 Å  2.82 Å  2.66 Å  2.81 Å |
| 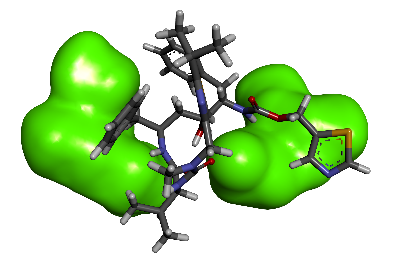  500 ns  Temperature: 0oC  Hydrogen Bond: 6 interactions  Poloxamer: 2 molecules | RIT - POL17:O2  POL17:H29 - RIT  RIT - POL17:O3  POL17:H12 - RIT  POL17:H27 - RIT  POL21:H27 - RIT | Hydrogen Bond  Hydrogen Bond  Hydrogen Bond  Hydrogen Bond  Hydrogen Bond  Hydrogen Bond | 2.67 Å  1.76 Å  2.62 Å  2.69 Å  2.85 Å  2.96 Å |

**Supplementary Table 2.** Interaction Dynamics of the RTV and PLX During Molecular Dynamics Simulations (Cont.)

| **Melt-Cooling-A** | **Interaction** | **Category** | **Distance** |
| --- | --- | --- | --- |
| 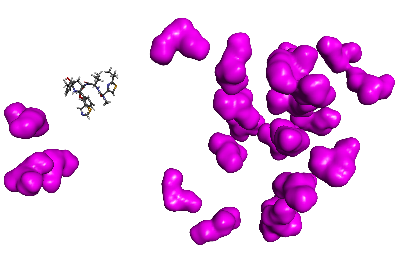  0 ns  Temperature: 0oC  Hydrogen Bond: 0 interaction  Poloxamer: 0 molecule | - | - | - |
| 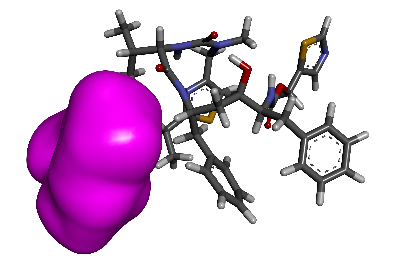  50 ns  Temperature: 20oC  Hydrogen Bond: 1 interaction  Poloxamer: 1 molecule | POL741:H27 - RIT | Hydrogen Bond | 2.66 Å |
| 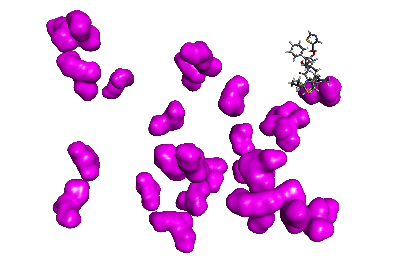  200 ns  Temperature: 80oC  Hydrogen Bond: 0 interaction  Poloxamer: 0 molecule | - | - | - |
